# Supplementary material for: Return of health research findings in Nigeria-perspective of potential research participants
Source: Research Square preprint supplement (doi:10.21203/rs.3.rs-7553414/v1), 2025-10-22
Supplement: Supplementary file 1 [file 44be7ccc4d0ab986d51e8766.docx]

**Focus Group Discussion Guide: Return of health research results in Nigeria-Perspective of potential research participants**

1) Welcome the participants and thank them for their time. Introduction of the research team and the purpose of the study. Explain the format of the discussion and ground rules (confidentiality, no right/wrong answers, everyone's opinion is valuable). Obtain consent for participation and audio-recording.

2)Questions:

- What are your general thoughts about researchers, research findings, and health research involving human biological specimens? (Probe: Place of trust; Research Vs Clinical care; primary research results Vs incidental findings; participation of healthy volunteers in biomedical research)
- What are your general thoughts about individual research results being returned to participants? (Probe: Risks, benefits? And why?)
- Do you think people should have the choice to receive their results? (Probe: Why is that important? Whose opinions should matter most? Do you think returning results should be a right for all participants? Why or why not?)
- Have any of you or someone you know ever participated in a research study involving human biological samples? (Probe: If so, were you offered or did you receive any individual results?)
- What kind of results would you want to receive? What would you *not* want to receive? (Probe: And why? e.g., positive findings, inconclusive findings, incidental findings).
- Who should be responsible for returning the results? And why?
- How would you prefer to receive your results? (e.g., in-person, e mail, phone call or public/family meeting). (Probe: And why? When would you want to receive your results? e.g., during the study, at the end of the study, only if there's a significant finding).
- What are your thoughts about possible challenges or barriers to the return of individual research findings? What are your thoughts about ways of overcoming these challenges and promoting the return of individual research results?

3) End of session :Is there anything else you think is important for researchers to consider regarding the return of individual research results? Provide the contact details for follow-up questions and a summary of the issues discussed. Closing remarks about how the research information will be used. Thank everyone for their participation and time.

**THANK YOU!! DA ALU!! (VC/OICO/EA-UNN)**
