# Supplementary material for: Return of health research findings in Nigeria-perspective of potential research participants
Source: Research Square preprint supplement (doi:10.21203/rs.3.rs-7553414/v1), 2025-10-22
Supplement: Supplementary file 2 [file edf5b64ed745b7b2bf7db6f0.docx]

**QUESTIONNAIRE**

**RESEARCH TITLE: RETURN OF HEALTH RESEARCH FINDINGS IN NIGERIA- PERSPECTIVE OF POTENTIAL RESEARCH PARTICIPANTS**

**SECTION A: BACKGROUND SOCIO-DEMOGRAPHIC INFORMATION**

**INSTRUCTION**: Please tick (✓) and/or complete the space below.

**Age**: years as at last birthday

**Marital status**: Single MarriedSeparated/ Divorced Widowed ( )

**Educational level attained**: Primary Secondary Tertiary No formal education Othersspecify…….

**Employment Status:** Employed Not employed

**Perceived Socio-economic Status** : High Middle Low

**Religion**: Christianity Islam Traditional religion Others (specify)............

**Ethnicity**: Ibo Non-Ibo Nigerian Non-Nigerian(specify).........

**SECTION B. HEALTH RESEARCH PARTICIPATION AND PERCEPTION ON RESEARCH/ RESEARCHERS/ RESEARCH FINDINGS**

1) Have you ever participated in any health research requiring human biological specimens? Yes No Not Sure

2) How would you rate your general knowledge about such health research?

Good Fair Poor

3) How would you describe the level of confidence in your knowledge of such research? Confident Not Confident

4) Do you know the significance of the participation of healthy, normal participants in this type of health research requiring HBS? Yes No Not sure

5) Do you expect every research to have a finding, whether positive or negative? Yes No Not Sure

6) What outcomes from these types of HBS-based research are you aware of? Primary Research results Incidental Findings Both None/Not Sure

7) Do you expect research findings to be made known to the government, public, research sponsors, or the research participants? Yes No Not Sure

Main reasons(specify)…………………………………………………………………

8) Who should have the main responsibility for disclosing the research findings?

The main researchers Any member of the research team Government Sponsors of the research Not sure

9) Do you have a habit of routinely searching for health research-related information in the same manner you would search for other types of information such as politics, economy, sports and religion? Yes No Not sure

10) Do you trust health researchers and their findings from their research? Yes No Not Sure

Main reasons(specify)………………………………………………………………….

**SECTION C: DESIRE FOR RETURN OF INDIVIDUAL RESEARCH FINDINGS**

11) As a research participant, would you be interested in having your individual research findings returned or disclosed to you? Yes No Not sure

Main reasons(specify)……………………………………………………………

12)If yes to Q11,which ones would you want returned to you?

Primary research results only Incidental Findings only Both types

13) In deciding to return research findings, whose opinion should matter most?(Choose one)

Researchers Participants Both researchers and participants Not sure

**SECTION D: PROCESS FOR RETURN OF RESEARCH FINDINGS**

14) How would you want your individual research findings returned?(Choose one)

Face-to Face meeting Telephone E mail At a Public/family forum

Main reasons (specify)……………………………………………………….

15) Would you prefer E mail disclosure to Face-to Face meeting? Yes No Not Sure

16) Would you prefer Phone disclosure to Face-to face meeting ? Yes No Not sure

17) Would you prefer disclosure of your individual research results at a public/family forum?

Yes No Not sure

Main reason(specify)…………………………………………………………

18) Do you think individual research results should be shared with other people or with the community?

Yes No Not Sure

Main reasons (specify )………………..

19) If required, who would you be most willing to share your individual research results with?(choose one)

Parents Spouse Children Siblings Friends/Colleagues Other family relatives None

20)When would be the ideal time for participants to receive any returned research result?(choose one)

During the study After the Study No Preference

21) Is it very important to you that your research findings be kept private and not shared with others without your permission? Yes No Not sure

**SECTION E: PREFERENCES FOR TYPES OF RESEARCH RESULTS**

**Which types of research results would you be interested in being returned to you? (Tick as many as possible)**

22)Result that is actionable or has clinical utility (preventable, curable, tolerable conditions)

23) Result indicates a condition that is clearly curable

24) Result indicates a serious condition with late-adult onset of manifestation

25) Result that is of no clinical significance/utility

26) Result that is not interpretable by the researcher (unknown meaning)

27) Result indicates a life-threatening condition

28) Result indicates a serious but not life-threatening condition

29) Result indicates a genetic, familial or hereditary disease

30) Result suggests likelihood of having mental disorder

31) Result which has potential for stigmatization

32) Results suggestive of a risk of developing a condition, regardless of the level of risk

33) Results whose meanings could still change with time

34) Results indicating non-medical conditions like facial features, skin tone, hair color/texture, fingerprints

35) Results indicating need for further specialized investigations beyond the scope of the research

**SECTION F:CHALLENGES FOR RETURN OF RESEARCH RESULTS AND MEASURES FOR OVERCOMING THEM**

36)What are the perceived or known challenges, barriers or impediments to having individual research results returned to participants? (Tick as many as applicable)

Lack of adequate research funding

Lack of incentives for researchers

Challenges with logistics

Ethical/Moral concerns

Regulatory issues

Researchers lacking interest in returning results

Low level of health literacy among participants

Participants not desiring the results

Inconclusive or incomplete results

Possible harm to participant, family or community

Distrust for researchers

Risk of participants wrongly thinking they are participating to receive medical treatment

Fear of results getting into wrong hands

Belief that disclosing combined/aggregate results is adequate

Others(specify)………………………………….

37) What measures would help promote the return of individual research results to participants? (Choose as many as applicable)

Adequate funding for research

Adequate training of researchers on communication/community engagement

Policy formulation for return of results Provision of adequate incentives for researchers

Sharing of costs between researchers and participants

Others (specify)……………………………………………………………..

38) Regarding sharing costs for return of individual research results, should it be made optional for research participants? Yes No Not sure

39) Regarding sharing costs for return of individual research results, should it be made mandatory for researchers and their sponsors to bear the costs completely? Yes No Not Sure

40)Who should have the primary responsibility to implement and monitor the suggested measures? (choose one)

Government Researchers Government/Researchers Community Participants Not Sure

**THANK YOU!! DA ALU!! (VC/OICO/EA-UNN)**
